# Supplementary material for: Diversification of Campylobacter jejuni Flagellar C-Ring Composition Impacts Its Structure and Function in Motility, Flagellar Assembly, and Cellular Processes
Source: PubMed Central journal article supplement (PMC6946799; doi:10.1128/mbio.02286-19), 2020-01-07
Supplement: mBio.02286-19-st001.pdf [file mBio.02286-19-st001.pdf]

**Table S1. Bacterial strains used in this study**

| Strain                 | Genotype                                                                                                                                                                                                                                   | Source/Reference    |
|------------------------|--------------------------------------------------------------------------------------------------------------------------------------------------------------------------------------------------------------------------------------------|---------------------|
| DH5 $\alpha$           | <i>E. coli supE44 <math>\Delta</math>lacU169 (<math>\phi</math>80lacZDM15) hsdR17 recA1 endA1 gyrA96 thi-1 relA1</i>                                                                                                                       | Invitrogen          |
| DH5 $\alpha$ /pRK212.1 | DH5 $\alpha$ with conjugation transfer element                                                                                                                                                                                             | (3)                 |
| BL21 (DE3)             | <i>E. coli fhuA2 [lon] ompT gal (<math>\lambda</math> DE3) [dcm] <math>\Delta</math>hsdS <math>\lambda</math> DE3 = <math>\lambda</math> sBamHIo <math>\Delta</math>EcoRI-B int::(lacI::PlacUV5::T7 gene1) i21 <math>\Delta</math>nin5</i> | New England Biolabs |
| XL1-Blue               | F <sup>'</sup> ::Tn10 proA <sup>+</sup> B <sup>+</sup> lacI <sup>q</sup> $\Delta$ (lacZ)M15/recA1 endA1 gyrA96 (Nal <sup>r</sup> ) thi hsdR17 (rK <sup>-</sup> mK <sup>+</sup> ) glnV44 relA1 lac                                          | (4)                 |
| DRH212                 | 81-176 rpsL <sup>Sm</sup>                                                                                                                                                                                                                  | (1)                 |
| DRH2077                | 81-176 rpsL <sup>Sm</sup> $\Delta$ fliF                                                                                                                                                                                                    | (5)                 |
| DRH2257                | 81-176 rpsL <sup>Sm</sup> $\Delta$ astA $\Delta$ fliI                                                                                                                                                                                      | (6)                 |
| DRH3302                | 81-176 rpsL <sup>Sm</sup> fliM::cat-rpsL                                                                                                                                                                                                   | This study          |
| DRH5332                | 81-176 rpsL <sup>Sm</sup> $\Delta$ fliH fliI::cat-rpsL                                                                                                                                                                                     | This study          |
| DRH6363                | 81-176 rpsL <sup>Sm</sup> $\Delta$ fliM/pDRH6346                                                                                                                                                                                           | This study          |
| DRH6411                | 81-176 rpsL <sup>Sm</sup> $\Delta$ fliH fliS::cat-rpsL                                                                                                                                                                                     | This study          |
| DRH6432                | 81-176 rpsL <sup>Sm</sup> $\Delta$ fliM $\Delta$ fliN                                                                                                                                                                                      | This study          |
| DRH6478                | 81-176 rpsL <sup>Sm</sup> $\Delta$ fliM $\Delta$ fliY/pDRH6346                                                                                                                                                                             | This study          |
| DRH6509                | 81-176 rpsL <sup>Sm</sup> $\Delta$ fliY/pDRH6472                                                                                                                                                                                           | This study          |
| DRH6521                | 81-176 rpsL <sup>Sm</sup> $\Delta$ fliH/pDRH6456                                                                                                                                                                                           | This study          |
| DRH6529                | 81-176 rpsL <sup>Sm</sup> $\Delta$ astA $\Delta$ fliI/pDRH6458                                                                                                                                                                             | This study          |
| DRH6542                | 81-176 rpsL <sup>Sm</sup> $\Delta$ fliM $\Delta$ fliY/pDRH6472                                                                                                                                                                             | This study          |
| DRH6609                | 81-176 rpsL <sup>Sm</sup> $\Delta$ fliY fliN::cat-rpsL                                                                                                                                                                                     | This study          |
| DRH6630                | 81-176 rpsL <sup>Sm</sup> $\Delta$ fliY $\Delta$ fliN                                                                                                                                                                                      | This study          |
| DRH6664                | 81-176 rpsL <sup>Sm</sup> $\Delta$ fliM $\Delta$ fliN/pDRH6461                                                                                                                                                                             | This study          |
| DRH6661                | 81-176 rpsL <sup>Sm</sup> $\Delta$ fliM $\Delta$ fliN/pDRH6346                                                                                                                                                                             | This study          |
| DRH6670                | 81-176 rpsL <sup>Sm</sup> $\Delta$ fliY $\Delta$ fliN/pDRH6472                                                                                                                                                                             | This study          |
| DRH6673                | 81-176 rpsL <sup>Sm</sup> $\Delta$ fliY $\Delta$ fliN/pDRH6461                                                                                                                                                                             | This study          |
| DRH6676                | 81-176 rpsL <sup>Sm</sup> $\Delta$ fliH fliY::kan-rpsL                                                                                                                                                                                     | This study          |
| DRH6713                | 81-176 rpsL <sup>Sm</sup> $\Delta$ fliY $\Delta$ fliH                                                                                                                                                                                      | This study          |
| DRH6723                | 81-176 rpsL <sup>Sm</sup> $\Delta$ fliY $\Delta$ fliH/pDRH6472                                                                                                                                                                             | This study          |
| DRH6726                | 81-176 rpsL <sup>Sm</sup> $\Delta$ fliY $\Delta$ fliH/pDRH6456                                                                                                                                                                             | This study          |
| DRH6856                | 81-176 rpsL <sup>Sm</sup> $\Delta$ fliY/pDRH6461                                                                                                                                                                                           | This study          |
| DRH6871                | 81-176 rpsL <sup>Sm</sup> $\Delta$ fliH fliN::kan                                                                                                                                                                                          | This study          |
| DRH7057                | 81-176 rpsL <sup>Sm</sup> $\Delta$ fliH fliN::kan/pDRH6461                                                                                                                                                                                 | This study          |
| DRH7060                | 81-176 rpsL <sup>Sm</sup> $\Delta$ fliH fliN::kan/pDRH6456                                                                                                                                                                                 | This study          |
| CRG479                 | 81-176 rpsL <sup>Sm</sup> /pDAR964                                                                                                                                                                                                         | (7)                 |
| CRG1004                | 81-176 rpsL <sup>Sm</sup> $\Delta$ fliM                                                                                                                                                                                                    | This study          |
| CRG1005                | 81-176 rpsL <sup>Sm</sup> $\Delta$ fliM                                                                                                                                                                                                    | This study          |
| CRG1760                | 81-176 rpsL <sup>Sm</sup> $\Delta$ fliM fliN::cat-rpsL                                                                                                                                                                                     | This study          |

|         |                                                                                      |            |
|---------|--------------------------------------------------------------------------------------|------------|
| JMB544  | 81-176 <i>rpsL</i> <sup>Sm</sup> $\Delta$ <i>fliH</i>                                | This study |
| JMB1242 | 81-176 <i>rpsL</i> <sup>Sm</sup> $\Delta$ <i>fliG</i>                                | (5)        |
| JMB1903 | 81-176 <i>rpsL</i> <sup>Sm</sup> $\Delta$ <i>astA</i> $\Delta$ <i>fliG</i> /pJMB1746 | (5)        |
| JMB2046 | 81-176 <i>rpsL</i> <sup>Sm</sup> $\Delta$ <i>astA</i> $\Delta$ <i>fliF</i> /pJMB2032 | (5)        |
| SNJ311  | 81-176 <i>rpsL</i> <sup>Sm</sup> <i>fliH::cat-rpsL</i>                               | This study |
| WPK611  | 81-176 <i>rpsL</i> <sup>Sm</sup> <i>fliY::kan-rpsL</i>                               | This study |
| WPK633  | 81-176 <i>rpsL</i> <sup>Sm</sup> <i>fliN::kan</i>                                    | This study |
| WPK662  | 81-176 <i>rpsL</i> <sup>Sm</sup> $\Delta$ <i>fliY</i>                                | This study |
| WPK663  | 81-176 <i>rpsL</i> <sup>Sm</sup> $\Delta$ <i>fliY</i>                                | This study |
| WPK672  | 81-176 <i>rpsL</i> <sup>Sm</sup> $\Delta$ <i>fliM</i> $\Delta$ <i>fliY</i>           | This study |
